# Supplementary material for: Mitochondrial haplogroups and variants defines differential severity of COVID-19 in the Pakistani population
Source: Research Square preprint supplement (doi:10.21203/rs.3.rs-5180392/v1), 2025-03-18
Supplement: Supplementary file 1 [file 10a8775d35ad2bc8e8fe5a21.xlsx]

## Sheet: Rev-STable 1
	Association of Haplogroups with COVID-19 disease. The table represents the association of COVID-19 groups i.e. Asymptommatic Mild (AMD), Moderate (MOD) and Critical/Severe(CS) COVID-19 groups in comparison to control. Chi-square or Fisher exact test was calculated along with odds ratio to asses the statistical significance; ns= not significant)
	Haplogroup	Healthy Controls (HC ;n=40)	All COVID-19 (n=147)	P-Value [OR (95%CI)] COVID-19 vs HC	AMD-COVID19 (n=64)	P-Value [OR (95%CI)] AMD-COVID-19 vs HC	MOD-COVID19 (n=64)	P-Value [OR (95%CI)] MOD-COVID-19 vs HC	CS-COVID19 (n=40)	P-Value [OR (95%CI)] CS-COVID-19 vs HC
	M	25 (62.5%)	63 (42.8%)	0.032 [0.45 (0.35 - 0.51)]	29 (45.3%)	ns	23 (53.5%)	ns	11 (27.5%)	0.003 [0.23 (0.16 - 0.43)]
	H	4 (10%)	16 (10.9%)	ns	5 (7.8%)	ns	3 (7%)	ns	8 (20%)	ns
	HV	3 (7.5%)	5 (3.4%)	ns	2 (3.1%)	ns	1 (2.3%)	ns	2 (5%)	ns
	T	3 (7.5%)	1 (0.7%)	0.031 [0.08 (0.001 - 0.04)]	0 (0%)	ns	1 (2.3%)	ns	0 (0%)	ns
	R	3 (7.5%)	16 (10.9%)	ns	9 (14.1%)	ns	2 (4.6%)	ns	5 (12.5%)	ns
	U	2 (5%)	27 (18.3%)	0.047 [4.27 (0.13 - 0.25)]	9 (14.1%)	ns	9 (21%)	ns	9 (22.5%)	0.047 [5.52 (0.12 - 0.38)]
	W	0 (0%)	10 (6.8%)	ns	7 (10.9%)	0.041[inf(0.05 - 0.2)]	2 (4.7%)	ns	1 (2.5%)	ns
	N	0 (0%)	2 (1.3%)	ns	1 (1.6%)	ns	0 (0%)	ns	1 (2.5%)	ns
	Z	0 (0%)	1 (0.7%)	ns	1 (1.6%)	ns	0 (0%)	ns	0 (0%)	ns
	K	0 (0%)	1 (0.7%)	ns	1 (1.6%)	ns	0 (0%)	ns	0 (0%)	ns
	A	0 (0%)	1 (0.7%)	ns	0 (0%)	ns	1 (2.3%)	ns	0 (0%)	ns
	D	0 (0%)	1 (0.7%)	ns	0 (0%)	ns	0 (0%)	ns	1 (2.5%)	ns
	F	0 (0%)	1 (0.7%)	ns	0 (0%)	ns	0 (0%)	ns	1 (2.5%)	ns
	I	0 (0%)	1 (0.7%)	ns	0 (0%)	ns	0 (0%)	ns	1 (2.5%)	ns
	X	0 (0%)	1 (0.7%)	ns	0 (0%)	ns	1 (2.3%)	ns	0 (%)	ns
