# Supplementary material for: Mitochondrial haplogroups and variants defines differential severity of COVID-19 in the Pakistani population
Source: Research Square preprint supplement (doi:10.21203/rs.3.rs-5180392/v1), 2025-03-18
Supplement: Supplementary file 2 [file 1431c343bb01c54caf3424c6.xlsx]

## Sheet: All_Haplogroups
	Supplementary Table 3: All minor haplogroups studied
	A17
	H13a1a1
	H2a
	H2a1a
	HV
	M18a
	M18b
	M30+16234
	M30d
	M35b4
	M36
	M3a1+204
	M3a1b
	M3a2
	M3c2
	M45a
	M5a
	M5a2a
	M5a2a1a1
	M5c1
	M6
	M65a+@16311
	M6a1b
	R30a1c
	R5a2
	T2i1
	U2a
	U2b1
	U2b2
	U2c
	W3a1
	W6
	X2p
	H
	H13a2a
	H1ca
	HV2a1*2
	M2b1
	M37e2
	M39b1*1
	M3d1a
	M4a
	M52a1b
	M5a2a4
	M5a5
	R
	R30b2a
	R8a1a1a1
	T1a1
	T1a2
	U5b2a1a1
	U9b1
	D4q*
	F1c1a2
	H15a1b
	H46
	H5a1
	H6a1b2
	HV2
	I1b
	M30d1
	M30g
	M4
	N1a1b1
	R2
	R30a1b
	U2a1a
	U5b2
	U7
	U7a
	U7b
	H+152
	H2b
	H7b
	HV12b1
	HV2a2
	K1b2a
	M
	M2a1a
	M2b1b
	M30
	M30c
	M35
	M3a1
	M3d
	M4"67
	M40a1
	M52a1
	M5a1b*
	M5b2a
	M5d
	M65b
	R0a2j
	R2d
	R5a1a
	R8a1a1d
	U1a1c1
	U2a2
	U2c1*
	U4d1
	U5b2a2
	U7a3b
	W1e1a
	W3a1b
	W3b
	W4
	Z1

## Sheet: Sheet1
Haplogroups identified in the studied groups
Haplogroups - MOD	Haplogroups-HC	Haplogroups-CS	Haplogroups-AMD
A17	H	D4q*	H
H13a1a1	H13a2a	F1c1a2	H+152
H2a	H1ca	H	H2b
H2a1a	HV	H13a2a	H7b
HV	HV2a1*2	H15a1b	HV12b1
M18a	M18a	H2a1a	HV2a2
M18b	M2b1	H46	K1b2a
M30+16234	M30+16234	H5a1	M
M30d	M37e2	H6a1b2	M18a
M35b4	M39b1*1	HV	M2a1a
M36	M3a1+204	HV2	M2b1b
M3a1+204	M3a2	I1b	M30
M3a1b	M3d1a	M18a	M30c
M3a2	M4a	M30d1	M35
M3c2	M52a1b	M30g	M3a1
M45a	M5a	M3a1+204	M3a1b
M5a	M5a2a1a1	M3a2	M3d
M5a2a	M5a2a4	M4	M4"67
M5a2a1a1	M5a5	M5a2a1a1	M40a1
M5c1	M5c1	M5c1	M52a1
M6	M6	M65a+@16311	M5a
M65a+@16311	M65a+@16311	N1a1b1	M5a1b*
M6a1b	M6a1b	R2	M5a2a1a1
R30a1c	R	R30a1b	M5a2a4
R5a2	R30b2a	R5a2	M5a5
T2i1	R8a1a1a1	U2a	M5b2a
U2a	T1a1	U2a1a	M5d
U2b1	T1a2	U2b2	M65a+@16311
U2b2	U5b2a1a1	U5b2	M65b
U2c	U9b1	U7	M6a1b
W3a1		U7a	N1a1b1
W6		U7b	R0a2j
X2p		W6	R2d
			R5a1a
			R5a2
			R8a1a1a1
			R8a1a1d
			U1a1c1
			U2a2
			U2b1
			U2c1*
			U4d1
			U5b2a2
			U7a3b
			U9b1
			W1e1a
			W3a1
			W3a1b
			W3b
			W4
			Z1
