# Supplementary material for: Mitochondrial haplogroups and variants defines differential severity of COVID-19 in the Pakistani population
Source: Research Square preprint supplement (doi:10.21203/rs.3.rs-5180392/v1), 2025-03-18
Supplement: Supplementary file 3 [file 48d0b6455487d3e9fa13e17a.xlsx]

## Sheet: Sheet1
	Supplementary Table 2. Major Haplogroups in Each study groups
		Major Haplogroup	Number	Percentage
	HC-group	M	25	0.625
		H	4	0.1
		R	3	0.075
		T	3	0.075
		HV	3	0.075
		U	2	0.05
	AMD group	M	29	0.4531
		R	9	0.1406
		U	9	0.1406
		W	7	0.1094
		H	5	0.0781
		HV	2	0.0312
		Z	1	0.0156
		K	1	0.0156
		N	1	0.0156
	CS group	M	11	0.275
		U	9	0.225
		H	8	0.2
		R	5	0.125
		HV	2	0.05
		D	1	0.025
		F	1	0.025
		W	1	0.025
		I	1	0.025
		N	1	0.025
	MOD-group	M	23	0.5349
		U	9	0.2093
		H	3	0.0698
		R	2	0.0465
		W	2	0.0465
		A	1	0.0233
		T	1	0.0233
		X	1	0.0233
		HV	1	0.0233
