# Supplementary material for: Mitochondrial haplogroups and variants defines differential severity of COVID-19 in the Pakistani population
Source: Research Square preprint supplement (doi:10.21203/rs.3.rs-5180392/v1), 2025-03-18
Supplement: Supplementary file 4 [file 6ac528a703913dcb6f828482.xlsx]

## Sheet: Venn_Final
	Supplementary Table 4: Distinct and common mitochondrial variations in different study groups
	Group or Groups	Variant Details
	[MODCOVID-19.] only	185G>A	235A>G	533A>G	663A>G	676G>A	721T>C	1462G>A	1842A>G	2619A>G	3254C>A	3444A>T	3591G>A	3669A>G	3720A>G	4113G>A	4230C>T	4248T>C	4417A>G	4673A>G	4688T>C	4734A>G	4745A>G	4772T>C	4824A>G	5081T>C	5094A>G	5417G>A	5442T>C	5786T>C	5790C>A	5893C>T	5918T>C	6040A>G	6216T>C	6371C>T	6908T>C	7049A>G	7076A>G	7109C>T	7271A>G	7521G>A	7711T>C	7894A>G	8020G>A	8146A>G	8155G>A	8167T>C	8269GCACCCCCTC>G
	[CS COVID-19.] only	57T>C	65TG>T	257A>G	309C>T	456C>T	513GCA>G	GCACA	748G>A	1352C>T	1664G>A	1709G>A	1927G>A	1978A>T	3311C>T	3738C>T	3970C>T	4080T>C	4164A>G	4219G>A	4225A>G	4336T>C	4484C>T	4562A>G	4727A>G	4883C>T	4913A>G	4947T>C	5178C>A	5181A>G	5773G>A	6119C>T	6227T>C	6366G>A	6377C>T	6599A>G	6617C>T	6671T>C	6734G>A	6917G>A	6962G>A	7283T>C	7444G>A	7598G>A	7684T>C	8041A>G	8113C>T	8152G>A	8389A>G
	[Healthy Control] only	485T>C	1531C>T	3630C>T	13132C>T	896A>G	2392T>C	5824G>A	6340C>T	15850T>G	64C>CT	3504T>C	5984A>G	55TA>T	9398A>G	12870C>A	13557A>G	14000T>A	15731G>A	16222C>T	4316A>G	7572T>C	15451C>T	7853G>A	6515T>G	9425A>G	11002A>G	13907A>G	463C>T	3866T>C	2416T>C	3963C>T	7280C>T	12192G>A	4946C>T	6383G>A	6755G>A	11701T>C	13437T>C	15113A>G	6491C>T	4843C>T	8679A>G	14446C>T	12633C>A	3396T>C	13539A>G	4592T>C	16163A>G
	[AMD COVID-19.] only	47G>A	51T>C	56A>AC	57T>TC	64C>T	72T>C	183A>G	188A>G	196T>C	209T>C	241A>G	243A>G	250T>C	297A>G	371C>CT	375C>T	447C>G	499G>A	567A>ACC	567A>ACCCC	614A>G	629T>C	710T>C	1189T>C	1303G>A	1383A>G	2218C>T	2220A>G	2355A>G	2404T>TC	2442T>C	2442T>A	2556A>T	3150T>C	3200T>C	3212C>T	3221A>G	3308T>C	3338T>C	3397A>G	3398T>C	3480A>G	3540T>C	3644T>C	3699C>G	3744A>G	3826T>C	3847T>C
	[AMD COVID-19.] and [MODCOVID-19.]	246T>C	302A>AC	513GCA>GCACACA	1193T>C	1406T>C	2833A>G	3486C>T	3537A>G	4370T>C	5027C>T	5153A>G	6221T>C	7337G>A	7961T>C	9833T>C	9834A>G	10325G>A	10845C>T	12561G>A	13263A>G	13326T>C	13350A>G	14935T>C	15217G>A	15784T>C	16207A>G
	[AMD COVID-19.] and [MODCOVID-19.] and [CS COVID-19.]	143G>A	189A>G	207G>A	217T>C	263A>G	310T>C	1243T>C	1719G>A	3316G>A	3505A>G	3915G>A	4093A>G	4232T>C	5046G>A	5186A>T	5460G>A	5894A>ACC	8594T>C	8994G>A	9055G>A	10084T>C	10754A>G	11293A>G	11674C>T	11947A>G	12106C>T	12414T>C	13194G>A	13635T>C	14040G>A	14544G>A	15049C>T	15385C>T	15884G>C	15884G>A	16051A>G	16172T>C	16206A>C	16209T>C	16265A>C	16289A>G	16318A>C	16352T>C	16356T>C	16524A>G	16526G>A
	[AMD COVID-19.] and [MODCOVID-19.] and [CS COVID-19.] and [Healthy Control]	73A>G	93A>G	146T>C	150C>T	152T>C	199T>C	200A>G	204T>C	309C>CCT	310T>TC	482T>C	489T>C	709G>A	750A>G	1438A>G	1811A>G	1888G>A	2706A>G	3105AC>A	3921C>T	4216T>C	4454T>C	4580G>A	4703T>C	4769A>G	7028C>T	8251G>A	8584G>A	8701A>G	8860A>G	8886G>A	9254A>G	9540T>C	10398A>G	10400C>T	10873T>C	11467A>G	11719G>A	12007G>A	12308A>G	12372G>A	12477T>C	12498C>T	12705C>T	13143T>C	14128A>G	14323G>A	14766C>T
	[MODCOVID-19.] and [CS COVID-19.]	228G>A	234A>G	239T>C	951G>A	2056G>A	3511A>G	4086C>T	4171C>T	5048T>C	6173C>T	6182G>A	6764G>A	8027G>A	8614T>C	8896G>A	9094C>T	9135A>G	9156A>G	9242A>G	9614A>G	11047C>A	12034C>T	12714T>C	12793T>C	13095T>C	13656T>C	13943C>T	14020T>C	14109C>T	14233A>G	14470T>C	15055T>C	15259C>T	15449T>C	15773G>A	15930G>A	16038A>G	16086T>C	16154T>C	16184C>T	16239C>T	16325T>C	16353C>T	16354C>T
	[MODCOVID-19.] and [CS COVID-19.] and [Healthy Control]	309C>CCCT	2259C>T	4851C>T	5783G>A	6413T>C	10727C>T	13708G>A	14872C>T	14905G>A	16261C>T
	[MODCOVID-19.] and [Healthy Control]	195T>C	575C>T	3144A>G	4917A>G	5147G>A	8697G>A	9300G>A	9632A>G	11251A>G	15452C>A	15607A>G	15928G>A	16234C>T
	[AMD COVID-19.] and [MODCOVID-19.] and [Healthy Control]	194C>T	195T>A	461C>T	513GCA>G	1391T>C	1508C>T	1822T>C	3531G>A	4101T>C	4639T>C	5082T>C	5301A>G	5319A>G	5558A>G	5585G>A	8110T>C	8310T>C	9329G>A	10640T>C	11314A>G	13135G>A	13368G>A	13966A>G	15094C>T	16188C>T	16224T>C	16231T>C	16319G>A	16355C>T	16497A>G
	[AMD COVID-19.] and [Healthy Control]	182C>T	214A>G	511C>T	593T>C	1453A>G	1462G>T	1598G>A	1780T>C	2755A>G	2831G>T	3384A>G	3834G>A	4732A>G	4991G>A	5237G>A	5744G>A	5999T>C	6131A>G	6260G>A	6386C>T	6647A>G	7193T>C	8158A>G	8502A>G	9299A>G	9336A>G	9449C>T	9716T>C	11083A>G	11350A>G	11827T>C	11935T>C	12061C>T	12615A>G	13215T>C	13254T>C	14094T>C	15148G>A	15349C>T	15670T>C	15672T>C	15951A>G	16214C>T	16274G>A	16275A>G	16287C>T	16327C>A	16344C>T
	[AMD COVID-19.] and [CS COVID-19.] and [Healthy Control]	1721C>T	3197T>C	7768A>G	7859G>A	9477G>A	10238T>C	10685G>A	11914G>A	13617T>C	13637A>G	14182T>C	16111C>T	16145G>A	16192C>T	16217T>C	16243T>C	16256C>T	16295C>T	16320C>T
	[AMD COVID-19.] and [CS COVID-19.]	42T>TC	151C>T	195T>C	A	247GA>G	513GCA>GCACA	980T>C	2772C>T	3741C>T	4529A>T	4916A>G	5360C>T	6026G>A	6253T>C	6392T>C	7657T>C	8137C>T	8473T>C	8684C>T	9932G>A	10142C>T	10790T>C	12501G>A	12654A>G	13434A>G	13500T>C	13651A>G	14305G>A	14569G>A	15314G>A	15924A>G	16071C>T	16270C>T	16293A>G	16309A>G	16391G>A
	[CS COVID-19.] and [Healthy Control]	153A>G	1008A>G	3010G>A	3507C>G	4959G>A	6620T>C	7967C>T	12076A>G	12397A>G	14668C>T	16176C>T
[truncated: 194 more columns]
