# Supplementary material for: Mitochondrial haplogroups and variants defines differential severity of COVID-19 in the Pakistani population
Source: Research Square preprint supplement (doi:10.21203/rs.3.rs-5180392/v1), 2025-03-18
Supplement: Supplementary file 5 [file 9245006dbc25791583606b8d.xlsx]

## Sheet: Sheet1
		Supplementary Table 4. Significantly Associated mutations with COVID-19 groups. The P-value was calcuated using Chi-square test and odds ratio with 95% CI are presented. Moreover Mitomap was used as reference for identification of these variants in other diseases.
	Sr.	Mutations	Gene	consequence_terms	aa change	COVID(n=147)	HC(n=40)	% in COVID19	% in Control	p_value	odds_ratio	ci_lower	ci_upper	gnomad_AN	gnomad_AC_hom	Reported in COVID19	Other diseases
	1	16051A>G	D-loop	upstream_gene_variant	-	16	0	10.8844	0	0.0253293	inf		inf	56416	1427	No	-
	2	16157T>C	D-loop	upstream_gene_variant	-	0	3	0	7.5	0.00921259	0			56433	33	No	-
	3	16163A>G	D-loop	upstream_gene_variant	-	0	3	0	7.5	0.00921259	0			56425	910	No	-
	4	16186C>T	D-loop	upstream_gene_variant	-	0	3	0	7.5	0.00921259	0			56420	782	No	-
	5	16311T>C	D-loop	upstream_gene_variant	-	36	3	24.4898	7.5	0.016762	4	1.16312	13.7561	53482	11686	No	-
	6	16335A>G	D-loop	upstream_gene_variant	-	0	2	0	5	0.0448508	0			56421	167	No	-
	7	214A>G	D-loop	upstream_gene_variant	-	2	5	1.36054	12.5	0.00539764	0.0965517	0.0179788	0.518512	56339	165	No	-
	8	263A>G	D-loop	upstream_gene_variant	-	135	29	91.8367	72.5	0.00230622	4.26724	1.7156	10.614	56420	55895	No	-
	9	310T>TC	D-loop	upstream_gene_variant	-	55	6	37.415	15	0.00751421	3.38768	1.33665	8.58592	7080	375	No	Possible protective factor for normal tension glaucoma
	10	461C>T	D-loop	upstream_gene_variant	-	3	4	2.04082	10	0.0388688	0.1875	0.040161	0.875384	56434	40	No	-
	11	489T>C	D-loop	upstream_gene_variant	-	58	23	39.4558	57.5	0.0485245	0.481681	0.237099	0.978561	56350	6162	No	Low VO2max response
	12	8697G>A	MT-ATP6	synonymous_variant	M	1	3	0.680272	7.5	0.0312928	0.0844749	0.00853923	0.835674	56422	3210	No	-
	13	5984A>G	MT-CO1	synonymous_variant	G	0	2	0	5	0.0448508	0			56429	144	No	-
	14	6340C>T	MT-CO1	missense_variant	T/I	0	2	0	5	0.0448508	0			56432	55	No	Prostate Cancer
	15	6491C>T	MT-CO1	synonymous_variant	L	0	2	0	5	0.0448508	0			56433	3	No	-
	16	6746C>T	MT-CO1	synonymous_variant	G	0	3	0	7.5	0.00921259	0			56434	8	No	-
	17	7804A>G	MT-CO2	synonymous_variant	L	0	3	0	7.5	0.00921259	0			56431	18	No	-
	18	7853G>A	MT-CO2	missense_variant	V/I	0	2	0	5	0.0448508	0			56421	259	No	-
	19	7967C>T	MT-CO2	synonymous_variant	L	1	3	0.680272	7.5	0.0312928	0.0844749	0.00853923	0.835674	56434	18	No	-
	20	15452C>A	MT-CYB	missense_variant	L/I	1	3	0.680272	7.5	0.0312928	0.0844749	0.00853923	0.835674	56415	6223	Dirican et al., 2022	-
	21	15607A>G	MT-CYB	synonymous_variant	K	1	3	0.680272	7.5	0.0312928	0.0844749	0.00853923	0.835674	56422	3136	No	-
	22	15850T>G	MT-CYB	synonymous_variant	T	0	2	0	5	0.0448508	0			56434	2	No	-
	23	153A>G	D-loop	upstream_gene_variant	-	1	4	0.680272	10	0.00780493	0.0616438	0.00668511	0.568422	56411	3123	No	-
	24	3507C>G	MT-ND1	synonymous_variant	T	1	3	0.680272	7.5	0.0312928	0.0844749	0.00853923	0.835674	56434	6	No	-
	25	3745G>A	MT-ND1	missense_variant	A/T	0	3	0	7.5	0.00921259	0			56406	105	No	LHON / high altitude variant
	26	4048G>A	MT-ND1	missense_variant	D/N	0	3	0	7.5	0.00921259	0			56404	329	No	-
	27	4592T>C	MT-ND2	synonymous_variant	I	0	3	0	7.5	0.00921259	0			56430	49	No	-
	28	4917A>G	MT-ND2	missense_variant	N/D	1	3	0.680272	7.5	0.0312928	0.0844749	0.00853923	0.835674	56429	3247	No	LHON / Insulin Resistance / AMD / NRTI-PN
	29	4946C>T	MT-ND2	synonymous_variant	I	0	2	0	5	0.0448508	0			56434	1	No	-
	30	5301A>G	MT-ND2	missense_variant	I/V	3	4	2.04082	10	0.0388688	0.1875	0.040161	0.875384	56433	137	No	-
	31	11251A>G	MT-ND4	synonymous_variant	L	1	3	0.680272	7.5	0.0312928	0.0844749	0.00853923	0.835674	56419	6211	No	Reduced risk of PD
	32	11467A>G	MT-ND4	synonymous_variant	L	28	2	19.0476	5	0.0303251	4.47059	1.01734	19.6455	56343	8766	No	Altered brain pH / sCJD patients
	33	10640T>C	MT-ND4L	synonymous_variant	N	3	4	2.04082	10	0.0388688	0.1875	0.040161	0.875384	56426	287	No	-
	34	12372G>A	MT-ND5	synonymous_variant	L	33	3	22.449	7.5	0.0405782	3.57018	1.03446	12.3216	56353	8901	No	Altered brain pH / sCJD patients
	35	12633C>A	MT-ND5	synonymous_variant	S	0	3	0	7.5	0.00921259	0			56433	717	No	-
	36	13998C>T	MT-ND5	synonymous_variant	D	0	3	0	7.5	0.00921259	0			56433	9	No	-
	37	14128A>G	MT-ND5	missense_variant	T/A	5	7	3.40136	17.5	0.00433598	0.165996	0.0495715	0.555857	56429	219	No	-
	38	955A>AC	MT-RNR1	non_coding_transcript_exon_variant	-	0	2	0	5	0.0448508	0.165996			56200	1	No	Possible association with sepsis
	39	5824G>A	MT-TC	non_coding_transcript_exon_variant	-	0	2	0	5	0.0448508	0			56424	61	No	-
	40	593T>C	MT-TF	non_coding_transcript_exon_variant	-	1	3	0.680272	7.5	0.0312928	0.0844749	0.00853923	0.835674	56418	140	No	Nonsyndromic hearing loss / LHON
	41	12192G>A	MT-TH	non_coding_transcript_exon_variant	-	0	2	0	5	0.0448508	0			56428	223	No	MICM / possible G15927A deafness modulator
	42	12308A>G	MT-TL2	non_coding_transcript_exon_variant	-	28	2	19.0476	5	0.0303251	4.47059	1.01734	19.6455	56336	8754	No	CPEO / Stroke / CM / Breast & Renal & Prostate Cancer Risk / Altered brain pH /sCJD
	43	4418T>C	MT-TM	non_coding_transcript_exon_variant	-	0	3	0	7.5	0.00921259	0			56429	220	No	-
	44	15970T>C	MT-TP	non_coding_transcript_exon_variant	-	0	3	0	7.5	0.00921259	0			56428	5	No	-
	45	4380C>T	MT-TQ	non_coding_transcript_exon_variant	-	0	3	0	7.5	0.00921259	0			56433	13	No	-
	46	5558A>G	MT-TW	non_coding_transcript_exon_variant	-	3	4	2.04082	10	0.0388688	0.1875	0.040161	0.875384	56429	134	No	Reported in tic disorder patient
